# Supplementary material
Source: Springer Nature journal article supplement (https://www.springermedizin.de/resource/supplementary/12990_2009_210_MOESM4_ESM.pdf/9612794)

## A Total behaviour

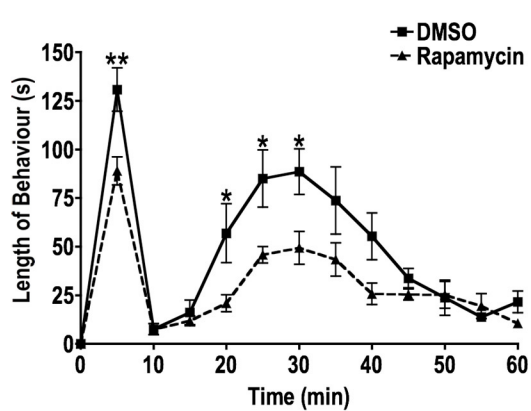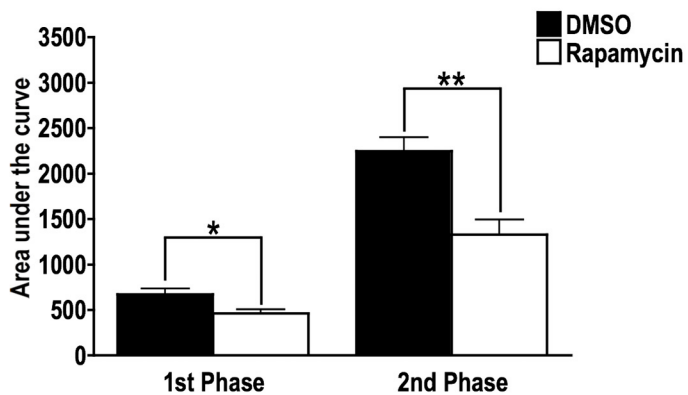

## B Licking and biting

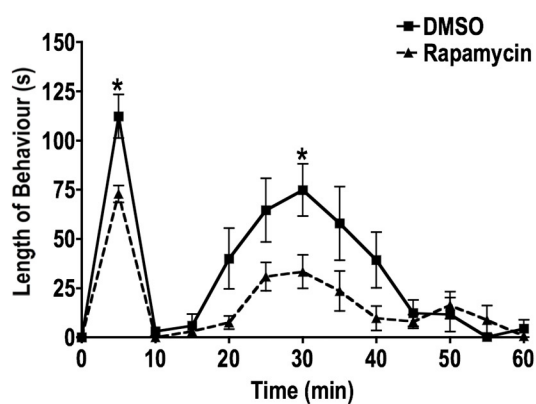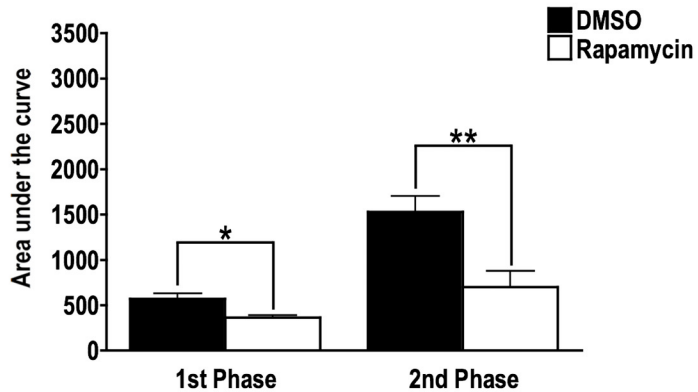

## C Lifting and flinching

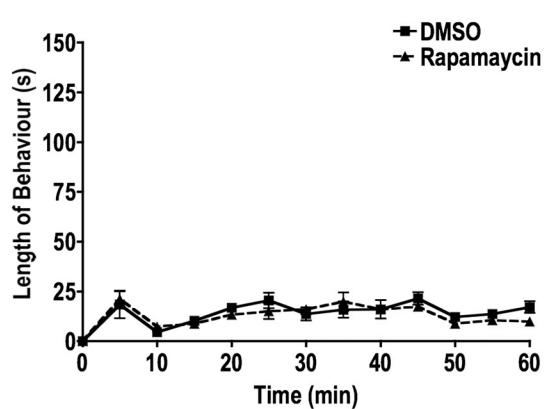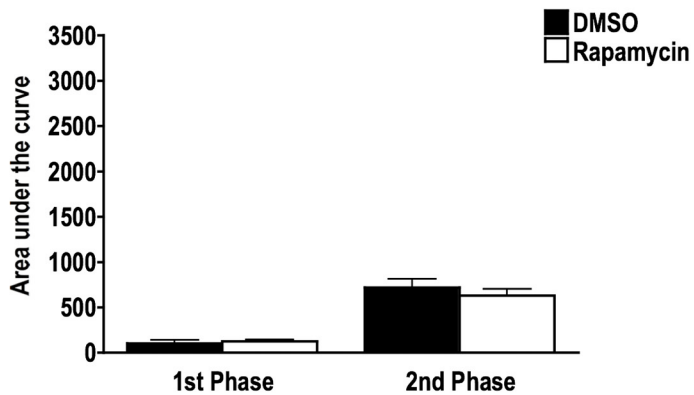

Supplement: MOESM4 [file 9612794]
